# Supplementary material for: Impact of hospital mergers on staff job satisfaction: a quantitative study
Source: PubMed Central journal article supplement (PMC4277837; doi:10.1186/1478-4491-12-70), 2014-12-12
Supplement: 12960_2014_462_MOESM2_ESM.pdf [file 12960_2014_462_MOESM2_ESM.pdf]

## **Additional File 2**

### **Title : Separate Analysis of Acute Hospital Data**

Results of the separate analysis of acute hospitals. The controls were selected using propensity score generated with time-varying, non-time varying and demand variables.

**Difference-in-difference estimator  $\delta_3$  using data from acute trust mergers alone.**

| Year, t   | (1) Main Analysis                            | (2) Robustness Test                          |                                |
|-----------|----------------------------------------------|----------------------------------------------|--------------------------------|
|           | 1 <sup>st</sup> – 3 <sup>rd</sup> Closest PS | 4 <sup>th</sup> – 6 <sup>th</sup> Closest PS | 7 – 9 <sup>th</sup> Closest PS |
| <b>-2</b> | 0.022<br>(0.016)                             | 0.028<br>(0.017)                             | 0.038<br>(0.015)               |
| <b>-1</b> | 0.040**<br>(0.012)                           | 0.043**<br>(0.011)                           | 0.042**<br>(0.012)             |
| <b>0</b>  | 0.014<br>(0.013)                             | 0.013<br>(0.012)                             | 0.018<br>(0.013)               |
| <b>1</b>  | 0.048**<br>(0.018)                           | 0.053**<br>(0.018)                           | 0.065**<br>(0.019)             |
| <b>2</b>  | 0.023<br>(0.039)                             | 0.013<br>(0.037)                             | 0.021<br>(0.040)               |
| <b>3</b>  | 0.025<br>(0.037)                             | 0.030<br>(0.038)                             | 0.028<br>(0.038)               |
| <b>4</b>  | -0.011<br>(0.035)                            | -0.017<br>(0.038)                            | -0.011<br>(0.036)              |

*Note: Cluster robust standard errors in parentheses. Baseline: 3 years before merger is approved by the regulator.*

\*  $p < 0.05$

\*\*  $p < 0.01$
