# Supplementary material for: Impact of hospital mergers on staff job satisfaction: a quantitative study
Source: PubMed Central journal article supplement (PMC4277837; doi:10.1186/1478-4491-12-70), 2014-12-12
Supplement: 12960_2014_462_MOESM3_ESM.pdf [file 12960_2014_462_MOESM3_ESM.pdf]

### **Additional File 3**

**Title : List of mergers**

List of mergers between 2009 – 2012 with their respective approval and merger years

| <b>No.</b> | <b>Type of<br/>Constituent Trusts</b> | <b>Number of<br/>Constituent Trusts</b> | <b>Approval Year</b> | <b>Merger<br/>Year</b> |
|------------|---------------------------------------|-----------------------------------------|----------------------|------------------------|
| <b>1</b>   | Acute                                 | 3                                       | 2009                 | 2009                   |
| <b>2</b>   | Acute                                 | 2                                       | 2009                 | 2009                   |
| <b>3</b>   | Mental health                         | 2                                       | 2009                 | 2010                   |
| <b>4</b>   | Mental health                         | 2                                       | 2011                 | 2012                   |
| <b>5</b>   | Acute                                 | 2                                       | 2011                 | 2012                   |
| <b>6</b>   | Acute specialist & Acute<br>teaching  | 2                                       | 2011                 | 2011                   |
| <b>7</b>   | Acute & Acute teaching                | 3                                       | 2011                 | 2012                   |
| <b>8</b>   | Acute                                 | 2                                       | 2012                 | 2012                   |
| <b>9</b>   | Acute & Acute teaching                | 2                                       | 2012                 | 2012                   |
